# Supplementary material
Source: MDPI journal article supplement (https://www.mdpi.com/2673-4079/5/2/9)
Supplement: s1 [file s1]

# Aqueous solution of ionic liquid is an efficient substituting solvent system for extraction of alginate from *Sargassum tenerrimum*

Kinjal Moradiya <sup>1,3</sup> and Matheus M. Pereira <sup>2</sup> Kamallesh Prasad <sup>1,3,\*</sup>

<sup>1</sup> Natural Products & Green Chemistry Division, CSIR-Central Salt, and Marine Chemicals, Research Institute, Gijubhai Badheka Marg, Bhavnagar 364 002, Gujarat, India; kinjalmoradiya7@gmail.com

<sup>2</sup> Academy of Scientific and Innovative Research (AcSIR), Ghaziabad 201002, India

<sup>3</sup> University of Coimbra, CERES, Department of Chemical Engineering, Rua Sílvia Lima, Pólo II – Pinhal de Marrocos, 3030-790 Coimbra, Portugal; matheus@eq.uc.pt

\* Correspondence: kamlesh@csmcri.res.in or drkamalleshp@gmail.com

## Table of contents

| No.        | Title                                                                                                                                                                                                                                                                                                                                                                                                                             | Page no. |
|------------|-----------------------------------------------------------------------------------------------------------------------------------------------------------------------------------------------------------------------------------------------------------------------------------------------------------------------------------------------------------------------------------------------------------------------------------|----------|
| Scheme S1  | Reaction Scheme for the synthesis of choline glycolate                                                                                                                                                                                                                                                                                                                                                                            | 2        |
| Scheme S2  | Reaction Scheme for the synthesis of choline acetate                                                                                                                                                                                                                                                                                                                                                                              | 2        |
| Scheme S3  | Reaction Scheme for the synthesis of choline formate                                                                                                                                                                                                                                                                                                                                                                              | 2        |
| Figure S1  | <sup>1</sup> H NMR of choline glycolate                                                                                                                                                                                                                                                                                                                                                                                           | 3        |
| Figure S2  | <sup>1</sup> H NMR of choline acetate                                                                                                                                                                                                                                                                                                                                                                                             | 3        |
| Figure S3  | <sup>1</sup> H NMR of choline formate                                                                                                                                                                                                                                                                                                                                                                                             | 4        |
| Figure S4  | <sup>1</sup> H NMR of Recovered choline glycolate                                                                                                                                                                                                                                                                                                                                                                                 | 4        |
| Figure S5  | FT-IR spectrum of synthesized choline glycolate                                                                                                                                                                                                                                                                                                                                                                                   | 5        |
| Figure S6  | FT-IR spectrum of synthesized choline acetate                                                                                                                                                                                                                                                                                                                                                                                     | 5        |
| Figure S7  | FT-IR spectrum of synthesized choline formate                                                                                                                                                                                                                                                                                                                                                                                     | 6        |
| Figure S8  | FT-IR spectra of cellulose extracted and standard                                                                                                                                                                                                                                                                                                                                                                                 | 6        |
| TableS1    | Docking affinity energy predicted by AutoDock Vinna for Alginate-Ligands (ILs ions and corresponding Deep Eutectic Solvents (HBA and HBD).<br>Docking pose with the lowest absolute value of affinity (kcal/mol) for Alginate with: (a) [Ch] <sup>+</sup> , (b) Cl <sup>-</sup> , (c) [Acetate] <sup>-</sup> , (d) Acetic acid, (e) [Formate] <sup>-</sup> , (f) Formic acid, (g) [Glycolate] <sup>-</sup> and (h) Glycolic acid. | 7        |
| Figure S9  |                                                                                                                                                                                                                                                                                                                                                                                                                                   | 8        |
| Figure S10 | <sup>1</sup> H NMR of choline chloride                                                                                                                                                                                                                                                                                                                                                                                            | 8        |
| Figure S11 | <sup>1</sup> H NMR of sodium alginate                                                                                                                                                                                                                                                                                                                                                                                             | 9        |
| Figure S12 | TGA curves of sodium alginate and choline alginate                                                                                                                                                                                                                                                                                                                                                                                | 9        |
| Figure S13 | DSC curve of sodium alginate                                                                                                                                                                                                                                                                                                                                                                                                      | 10       |
| Figure S14 | DSC curve of choline alginate                                                                                                                                                                                                                                                                                                                                                                                                     | 10       |
| Figure S15 | G'G'' Vs frequency for choline and sodium alginate                                                                                                                                                                                                                                                                                                                                                                                | 10       |

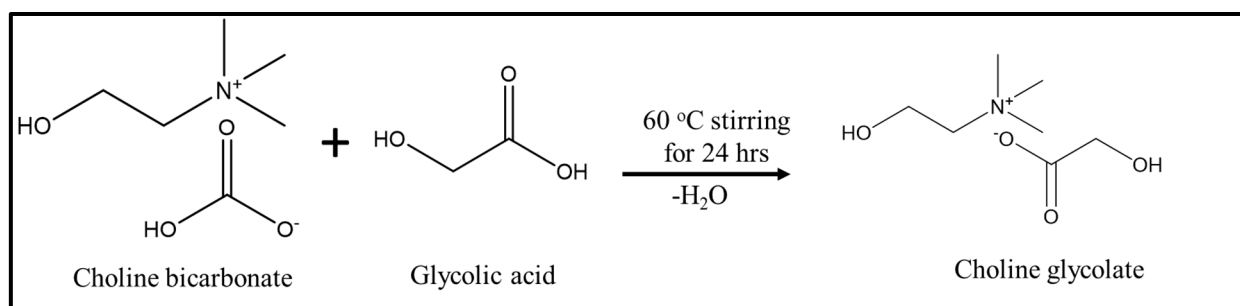

**Scheme S1.** Reaction Scheme for the synthesis of choline glycolate.

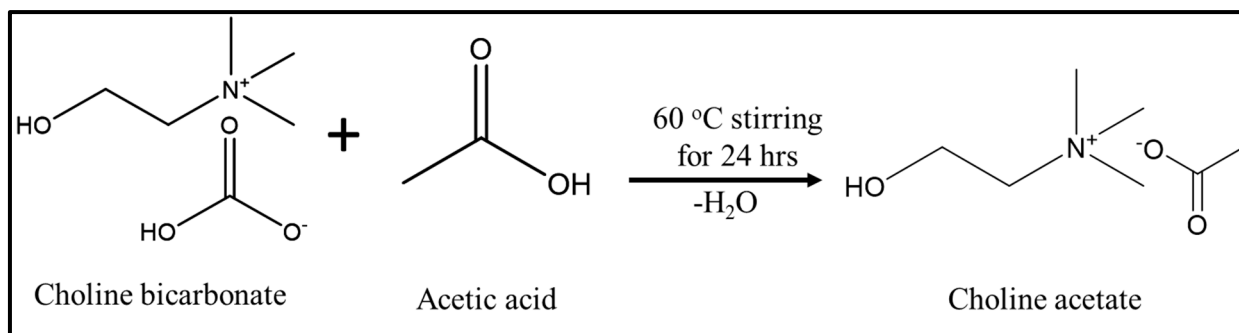

**Scheme S2.** Reaction Scheme for the synthesis of choline glycolate.

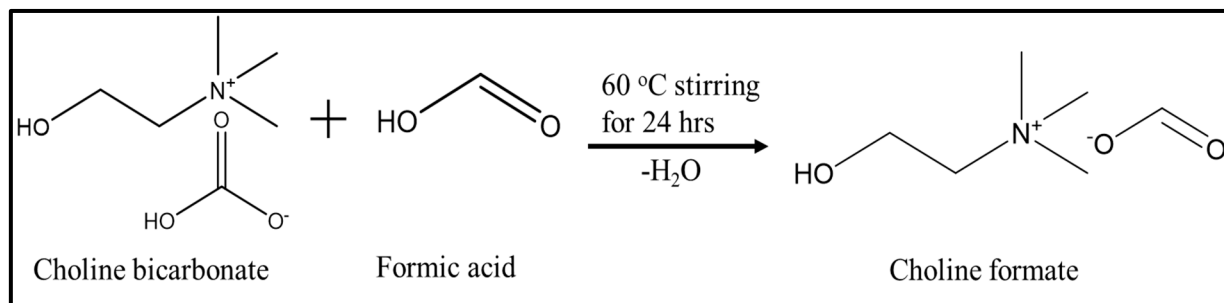

**Scheme S3.** Reaction Scheme for the synthesis of choline formate.

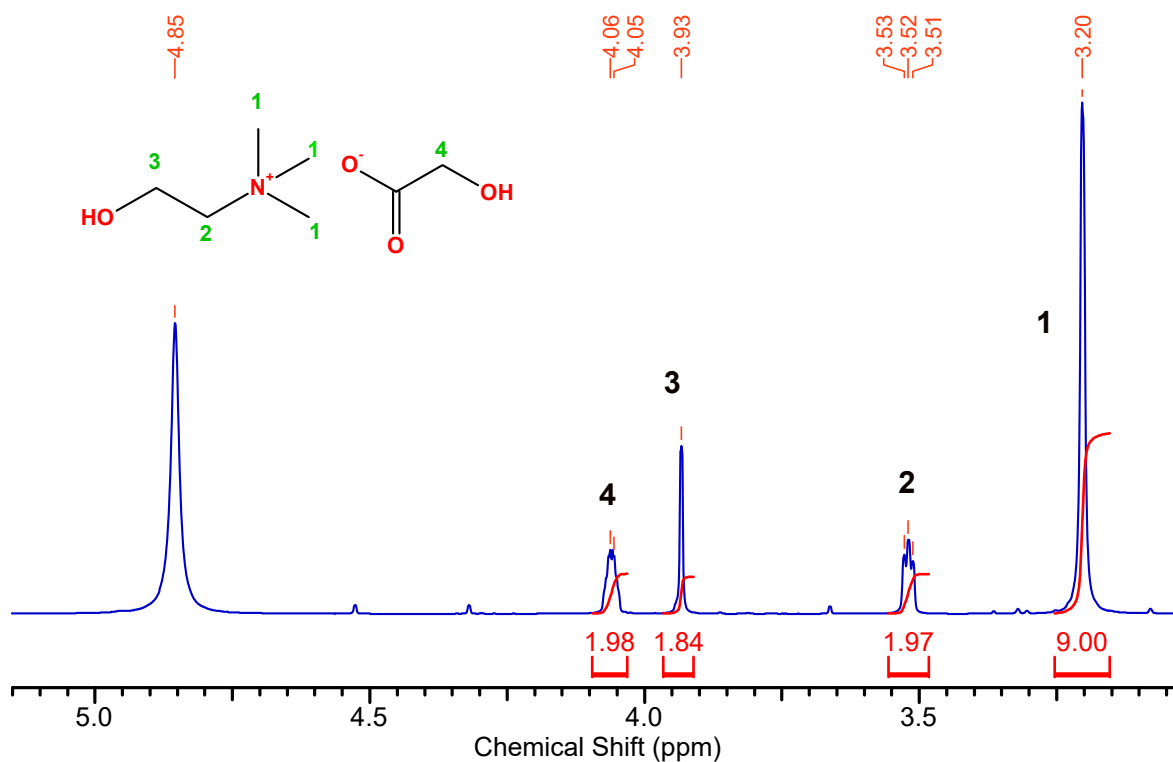

**Figure S1.**  $^1\text{H}$  NMR of choline glycolate.

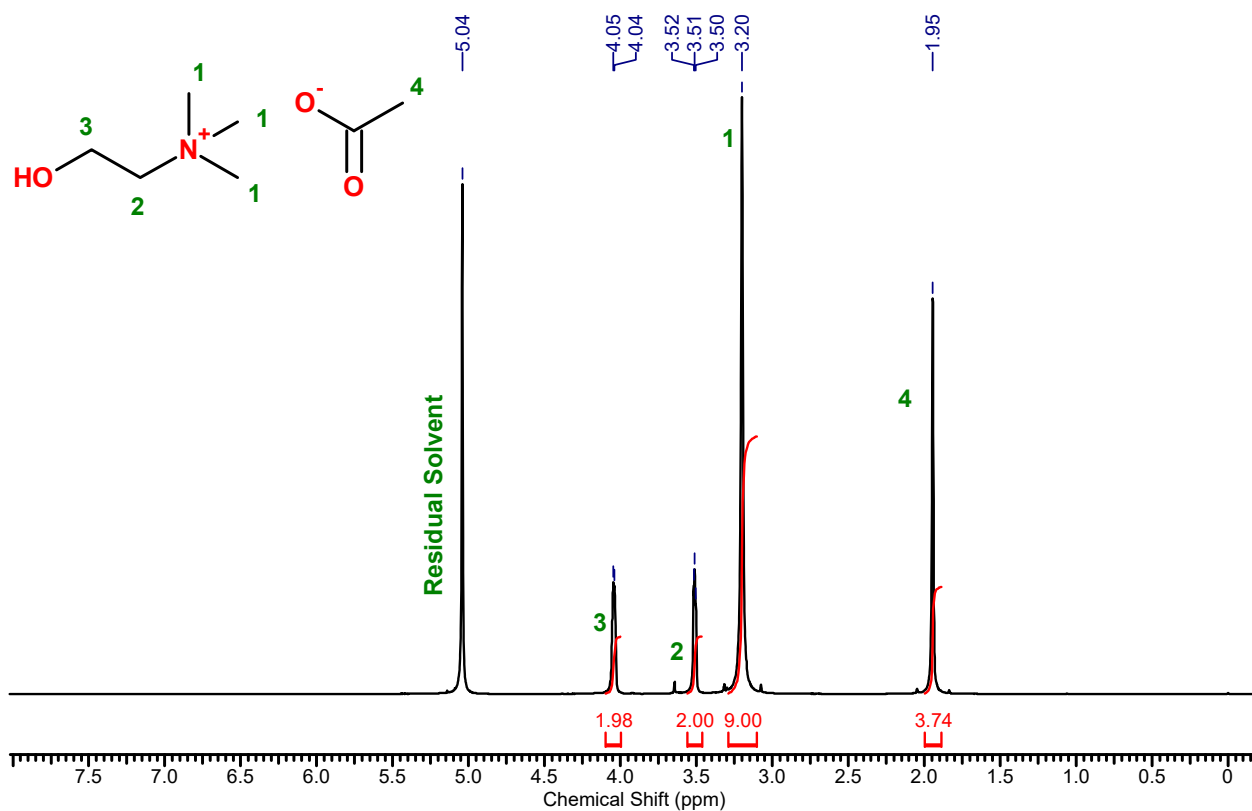

Figure S2. <sup>1</sup>H NMR of choline acetate.

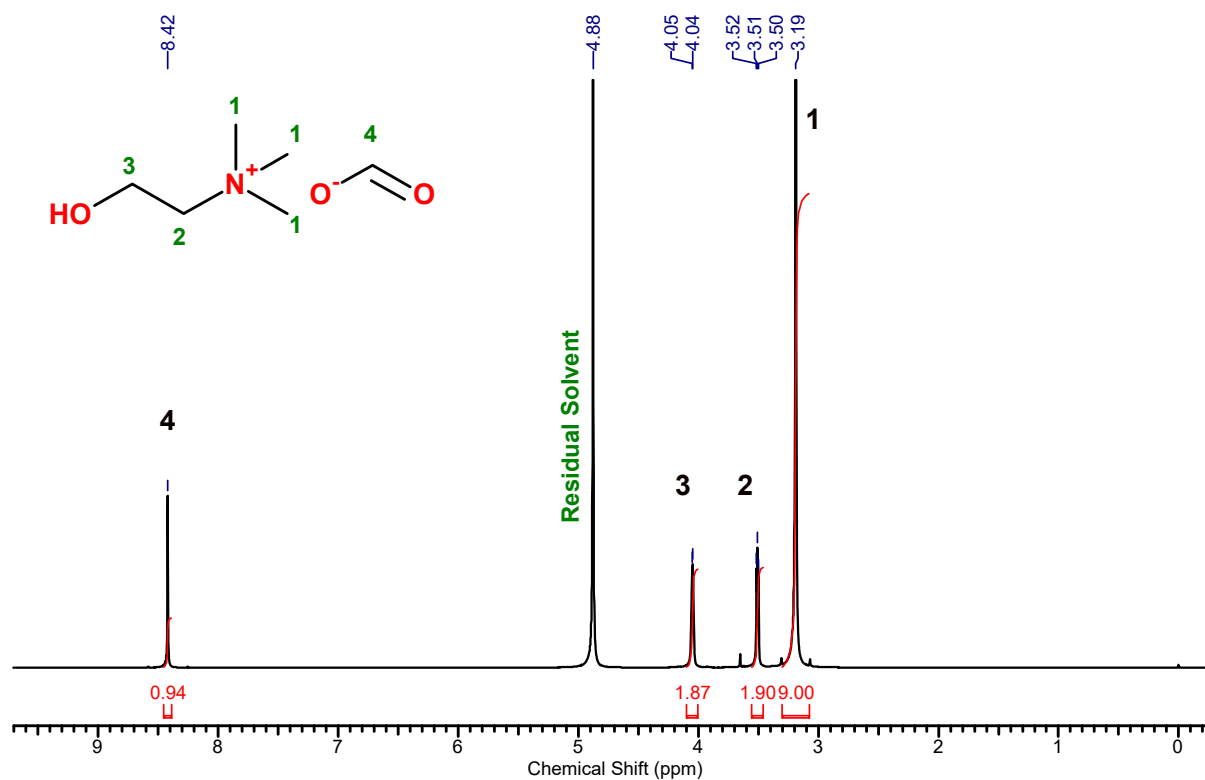

Figure S3. <sup>1</sup>H NMR of choline formate.

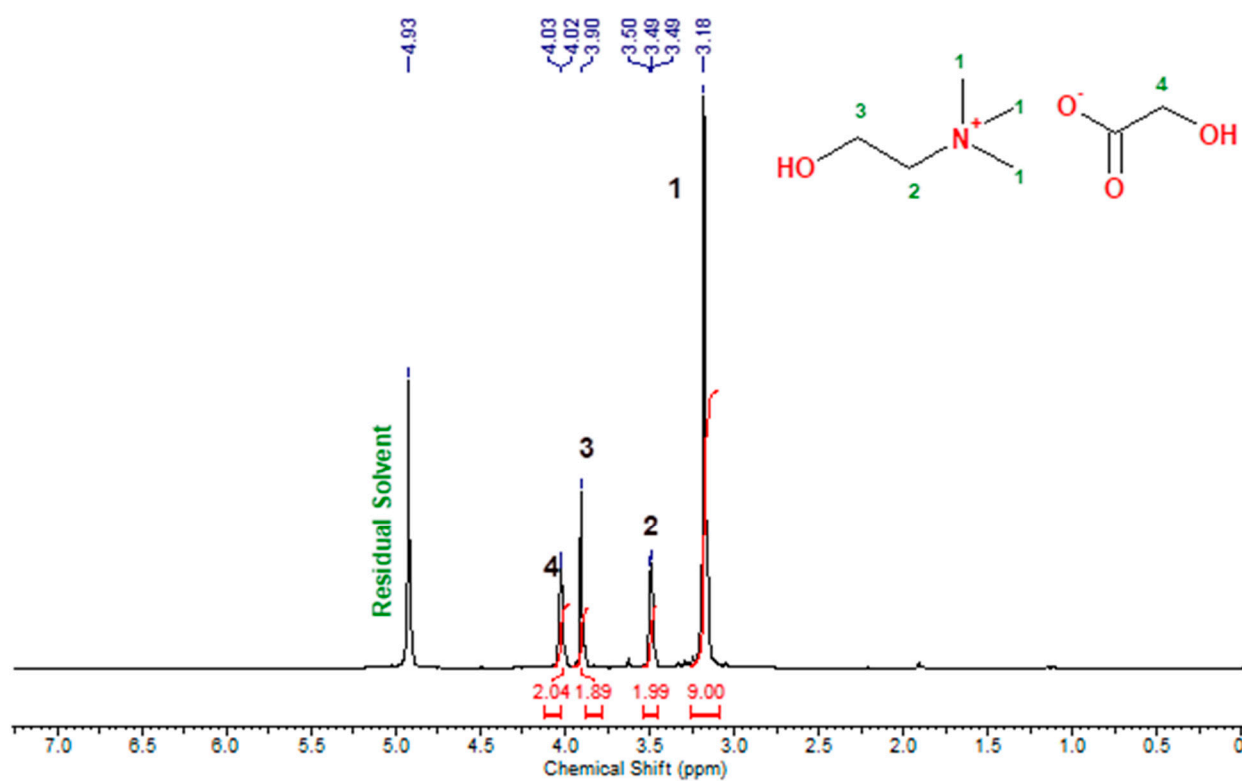

Figure S4.  $^1\text{H}$  NMR of Recovered choline glycolate.

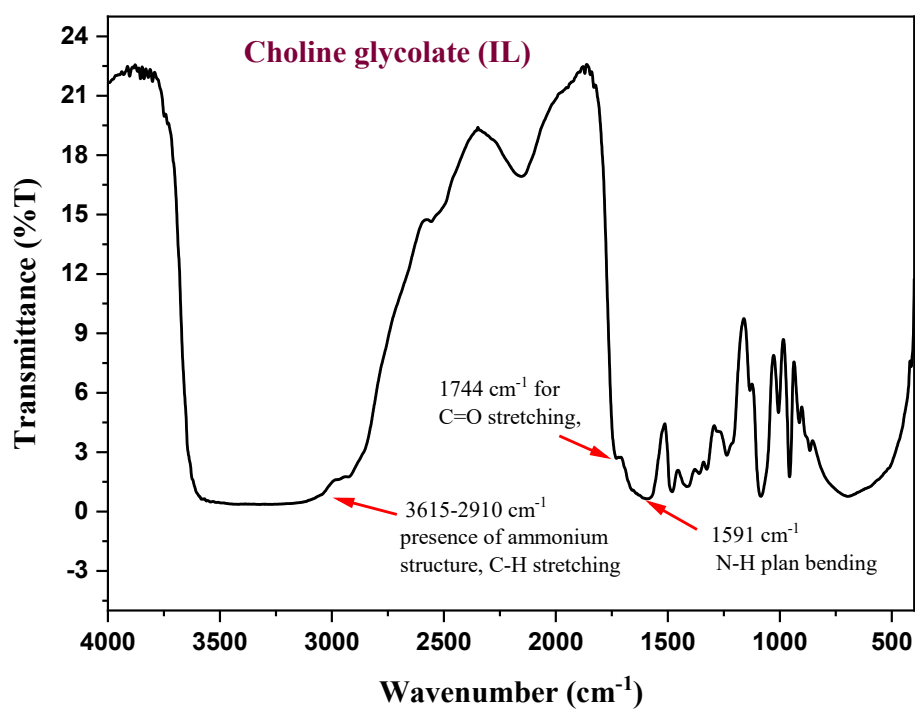

Figure S5. FT-IR spectrum of synthesized choline glycolate.

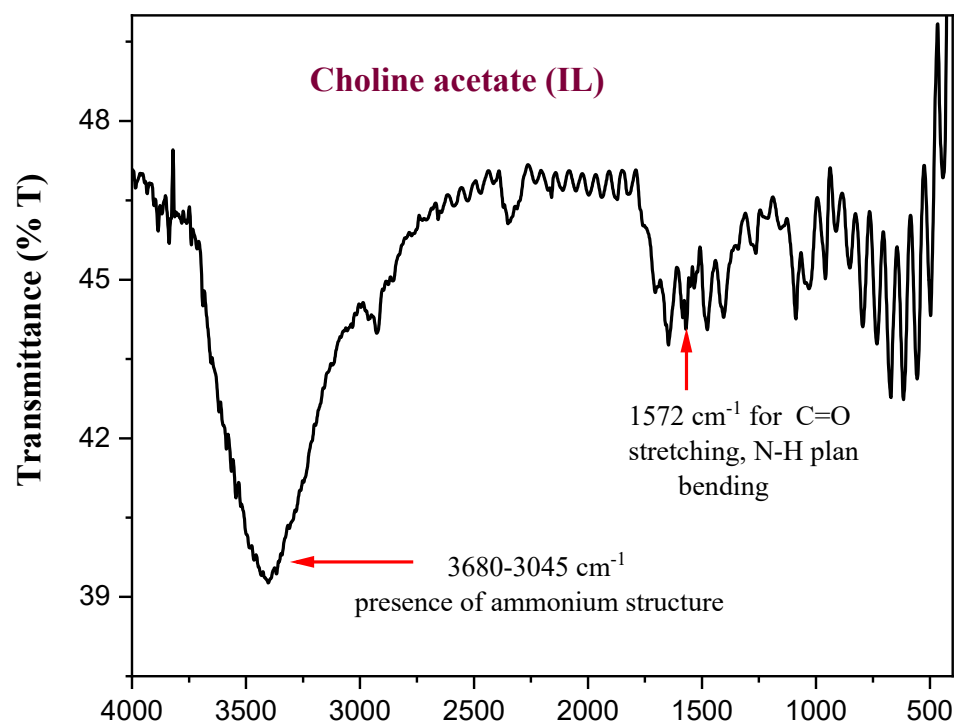

Figure S6. FT-IR spectrum of synthesized choline acetate.

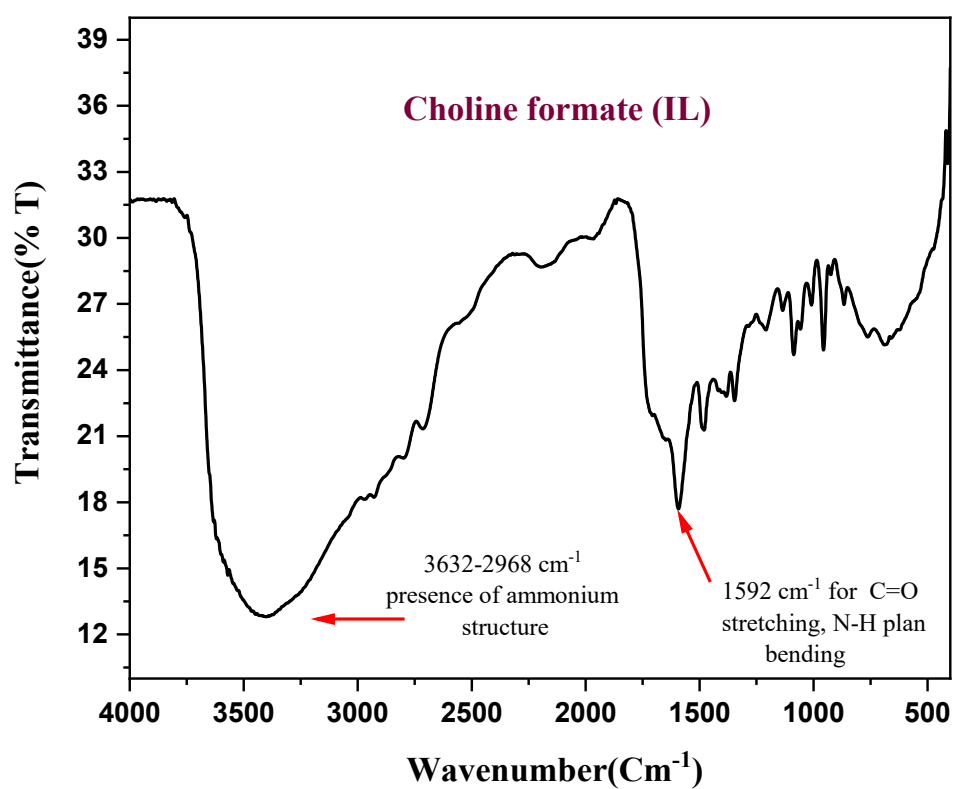

Figure S7. FT-IR spectrum of synthesized choline formate.

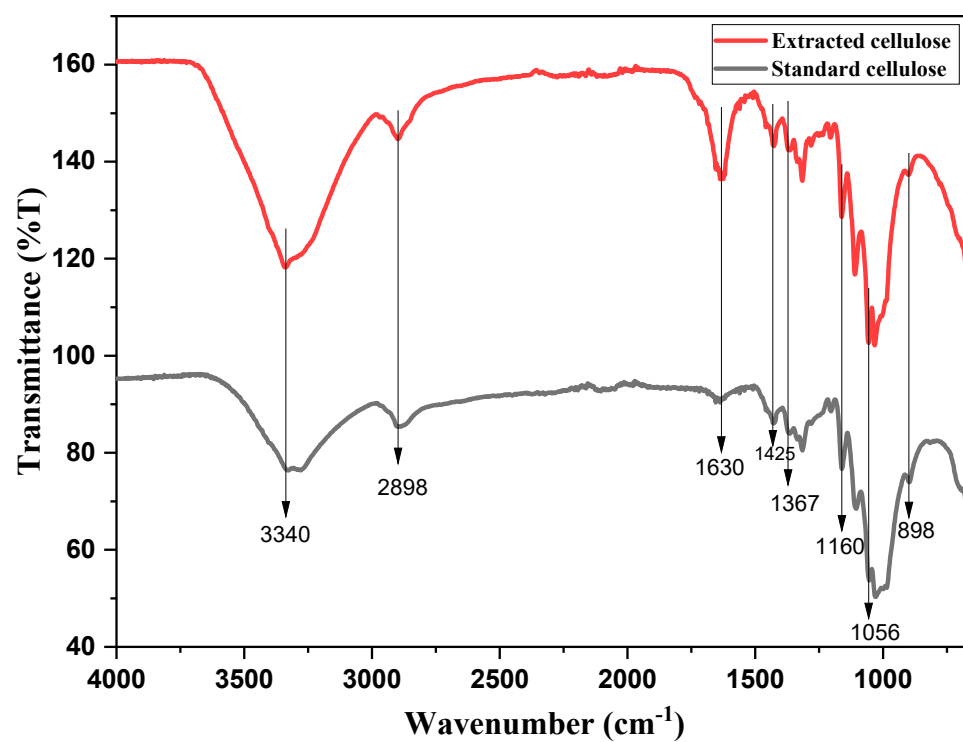

Figure S8. FT-IR spectra of cellulose extracted and standard.

**Table S1.** Docking affinity energy predicted by AutoDock Vinna for Alginate-Ligands (ILs ions and corresponding Deep Eutectic Solvents (HBA and HBD)).

| Ligand                   | Affinity (kcal/mol) | Type of interaction | From                   | To                       | Distance (Å) |
|--------------------------|---------------------|---------------------|------------------------|--------------------------|--------------|
| [Ch] <sup>+</sup>        | -2.0                | Electrostatic       | [Ch] <sup>+</sup>      | Alginate                 | 5.56         |
|                          |                     |                     | Alginate               | [Ch] <sup>+</sup>        | 3.02         |
|                          |                     |                     | [Ch] <sup>+</sup>      | Alginate                 | 3.59         |
|                          |                     |                     |                        |                          | 3.59         |
| Cl <sup>-</sup>          | -0.4                | Hydrogen Bond       | Alginate               | Cl <sup>-</sup>          | 3.67         |
| [Acetate] <sup>-</sup>   | -1.6                |                     |                        | [Acetate] <sup>-</sup>   | 3.43         |
| Acetic acid              | -1.9                |                     |                        | Acetic acid              |              |
|                          |                     |                     | Acetic acid            | Alginate                 | 2.63         |
| [Formate] <sup>-</sup>   | -1.5                |                     | [Formate] <sup>-</sup> | Alginate                 | 3.01         |
|                          |                     |                     |                        | [Formate] <sup>-</sup>   | 3.46         |
| Formic acid              | -1.7                |                     | Alginate               | Formic acid              | 2.72         |
|                          |                     |                     |                        |                          | 2.06         |
|                          |                     |                     | Formic acid            | Alginate                 | 2.53         |
|                          |                     |                     |                        |                          | 2.18         |
| [Glycolate] <sup>-</sup> | -2.1                |                     | Alginate               | Formic acid              | 3.79         |
|                          |                     |                     |                        | [Glycolate] <sup>-</sup> | 2.72         |
|                          |                     |                     |                        |                          | 2.12         |
|                          |                     |                     |                        |                          | 2.57         |
| Glycolic acid            | -2.2                |                     | Glycolic acid          | Glycolic acid            | 2.12         |
|                          |                     |                     |                        | Alginate                 | 1.88         |
|                          |                     |                     |                        |                          | 2.49         |
|                          |                     |                     |                        |                          | 2.56         |
|                          |                     |                     |                        |                          | 2.55         |

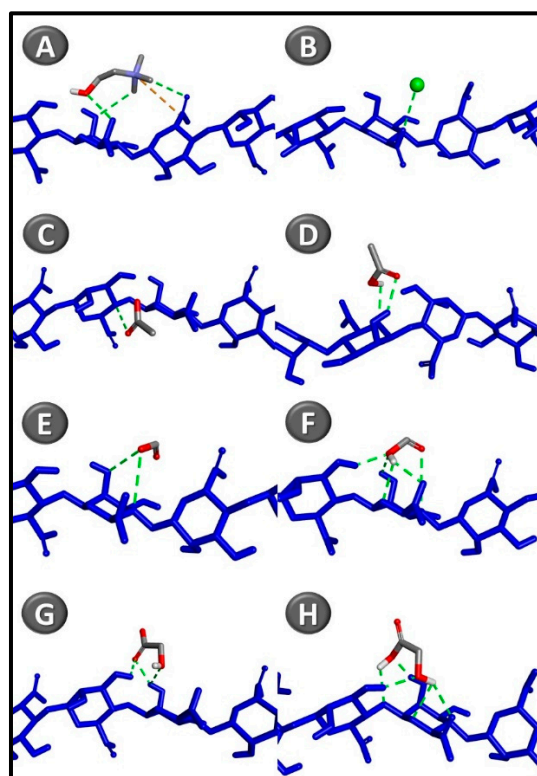

**Figure S9.** Docking pose with the lowest absolute value of affinity (kcal/mol) for Alginate with (a) [Ch]<sup>+</sup>, (b) Cl<sup>-</sup>, (c) [Acetate]<sup>-</sup>, (d) Acetic acid, (e) [Formate]<sup>-</sup>, (f) Formic acid, (g) [Glycolate]<sup>-</sup> and (h) Glycolic acid.

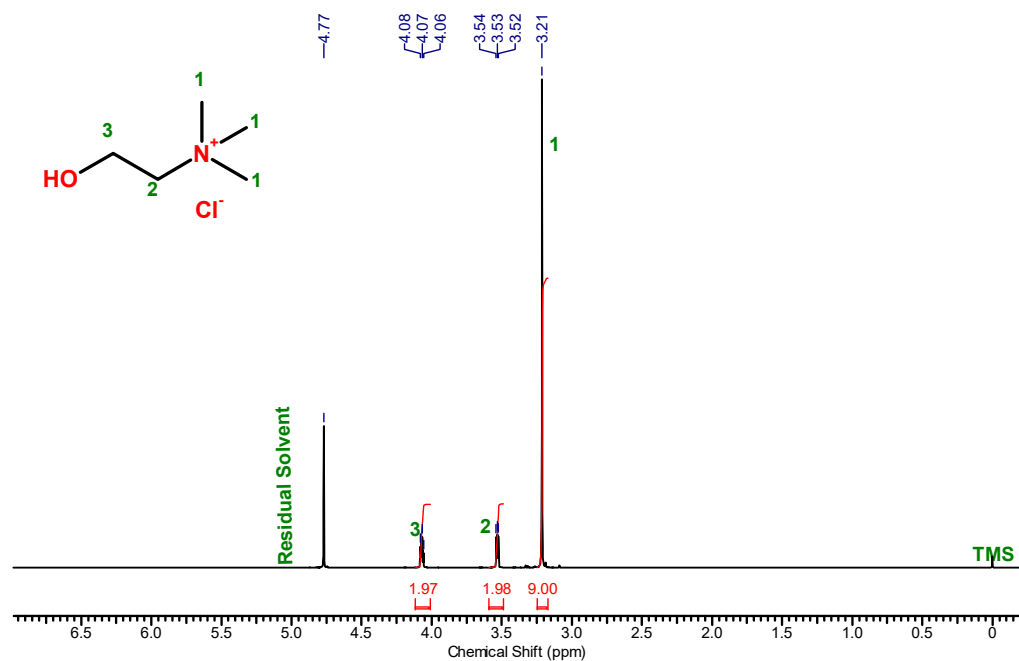

Figure S10. <sup>1</sup>H NMR of choline chloride.

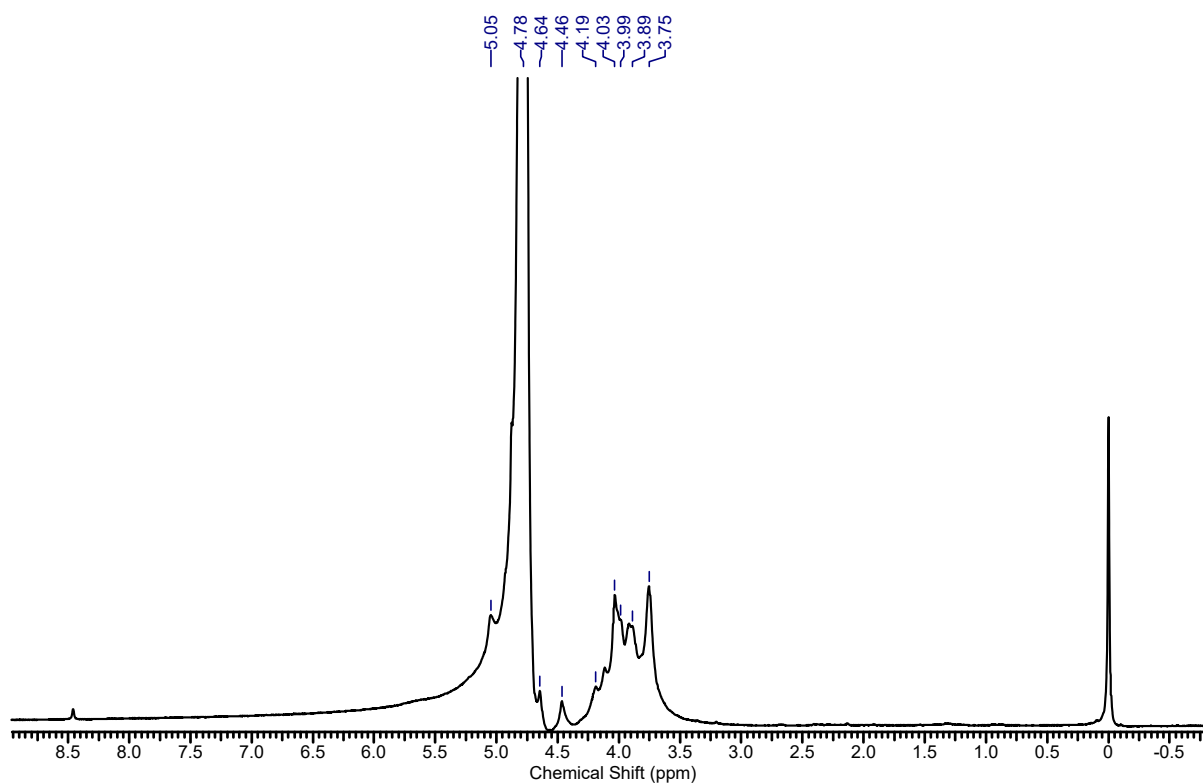

Figure S11. <sup>1</sup>H NMR of sodium alginate.



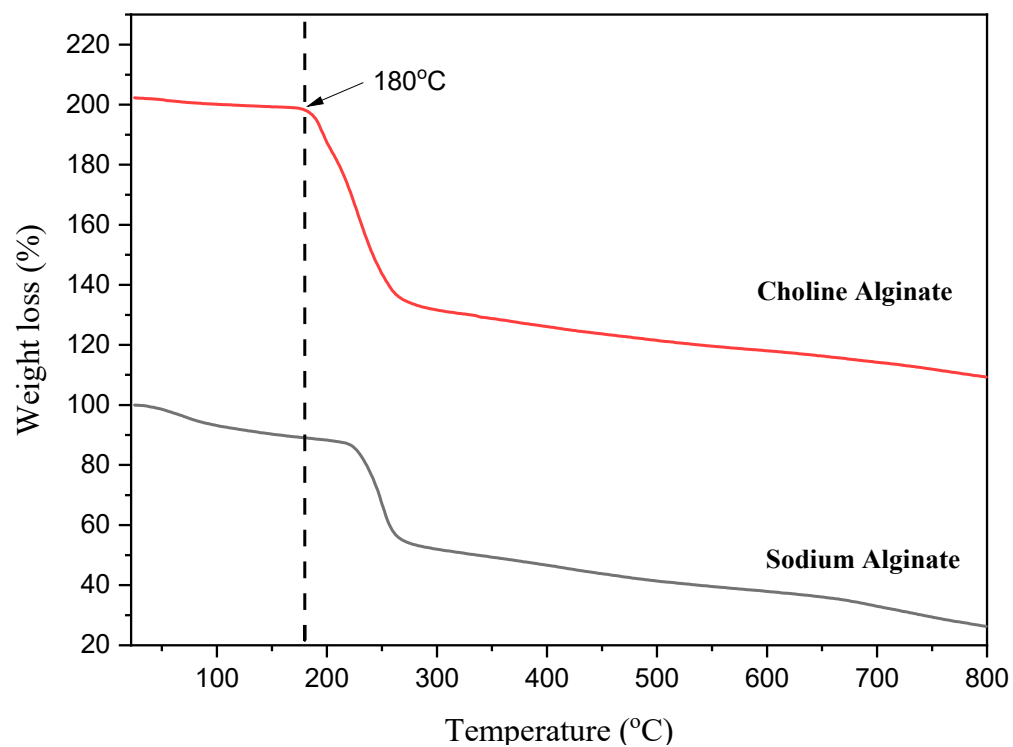

Figure S12. TGA curves of sodium alginate and choline alginate.

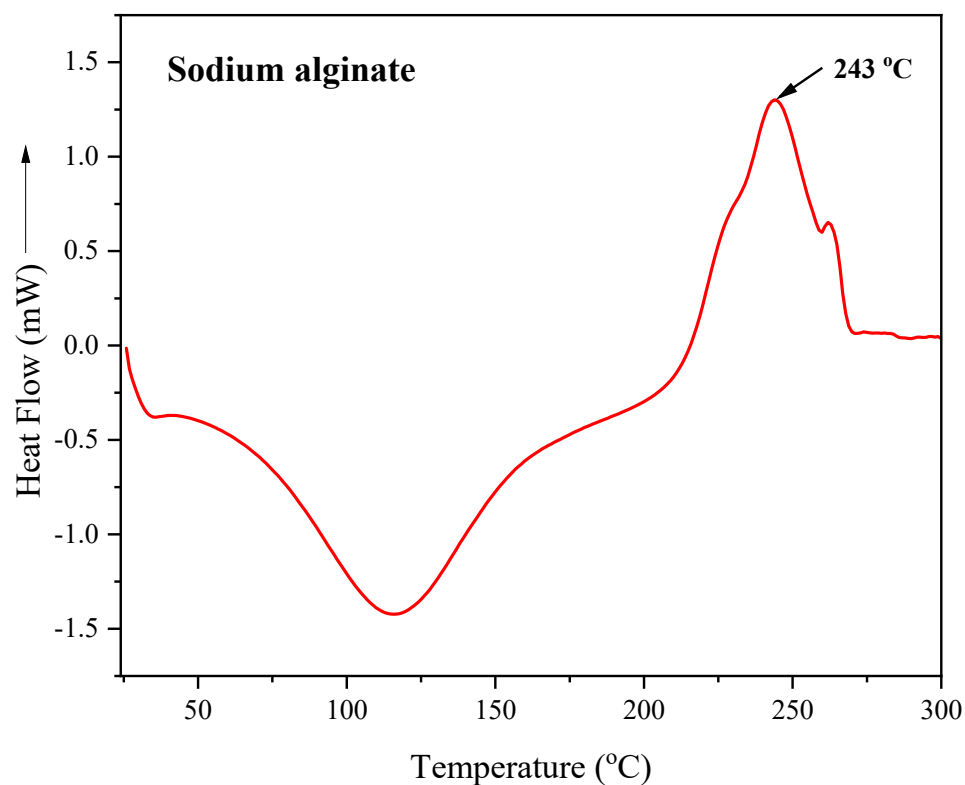

Figure S13. DSC curve of sodium alginate.

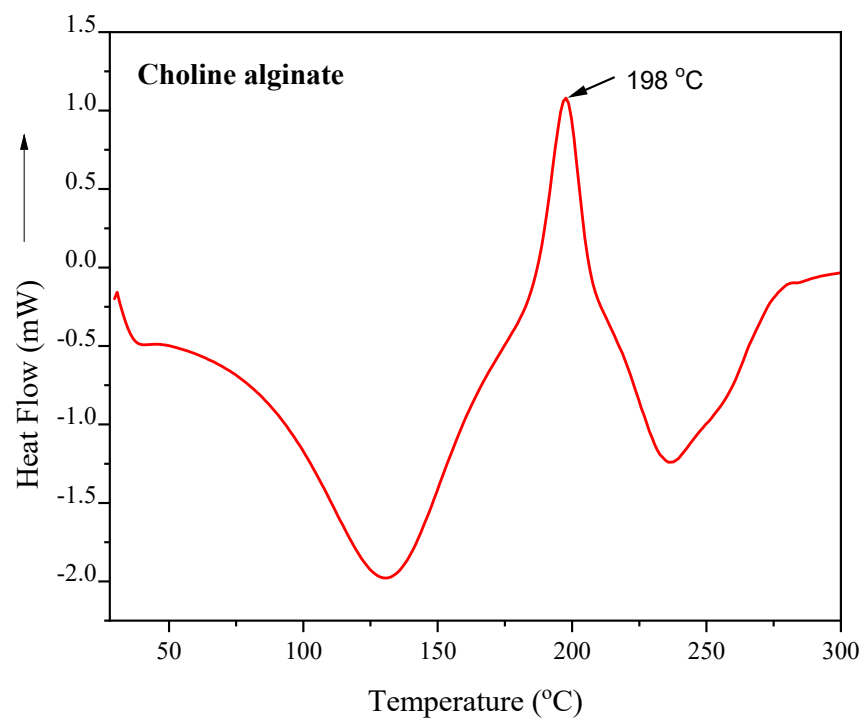

**Figure S14.** DSC curve of Choline alginate.

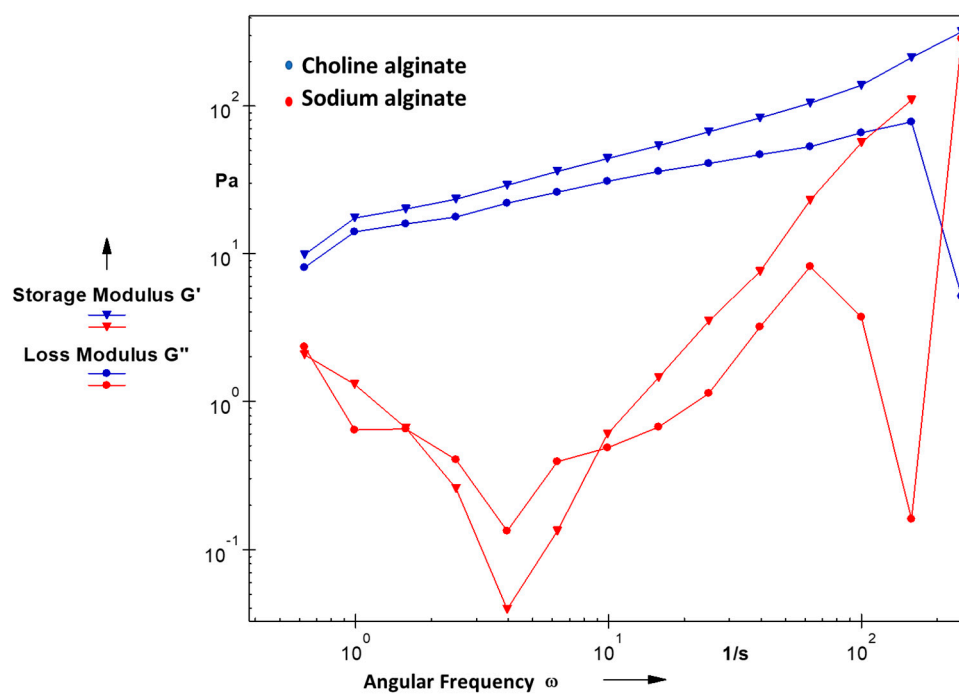

**Figure 15.** Frequency dependence of  $G'$  and  $G''$  for alginate prepared conventional and greener approach.
